# Supplementary material
Source: Springer Nature journal article supplement (https://www.springermedizin.de/resource/supplementary/12891_2010_1087_MOESM3_ESM.pdf/9507684)

# 20S Proteasome Activity

□ Control  
■ Compressed

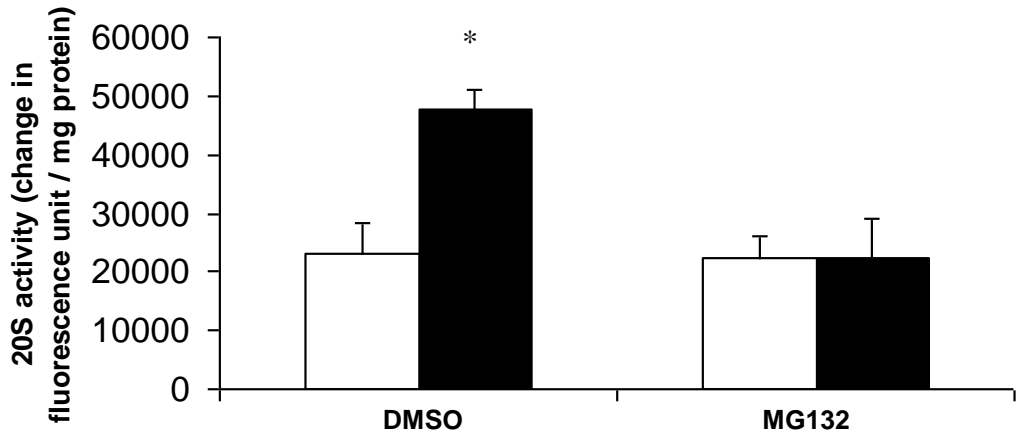

Supplement: MOESM3 [file 9507684]
